# Supplementary material for: How Does Online Information Influence Offline Transactions? Insights from Digital Real Estate Platforms
Source: Atypon-hosted journal article supplement (doi:10.1287/isre.2020.0658), 2023-10-17
Supplement: isre.2020.0658.sm1.pdf [file isre.2020.0658.sm1.pdf]

**Online Appendix for**  
**“How Does Online Information Influence Offline Transactions: Insights from**  
**Digital Real Estate Platforms”**

Zhengrui Jiang  
Business School  
Nanjing University,  
Nanjing, Jiangsu, China 210093  
[zjiang@nju.edu.cn](mailto:zjiang@nju.edu.cn)

Arun Rai  
Robinson College of Business  
Georgia State University  
Atlanta, GA 30303  
[arunrai@gsu.edu](mailto:arunrai@gsu.edu)

Hua Sun  
Ivy College of Business  
Iowa State University  
Ames, IA 50011  
[hsun@iastate.edu](mailto:hsun@iastate.edu)

Cheng Nie  
Ivy College of Business  
Iowa State University  
Ames, IA 50011  
[cheng@chengnie.com](mailto:cheng@chengnie.com)

Yuheng Hu  
Department of Information and Decision Sciences  
University of Illinois at Chicago  
Chicago, IL 60607  
[yuhenghu@uic.edu](mailto:yuhenghu@uic.edu)

**Table of Contents**

|                                                                                                      |           |
|------------------------------------------------------------------------------------------------------|-----------|
| <b>I. Full Regression Results</b> .....                                                              | <b>2</b>  |
| Table OA1. Regression Results using 2016 Dataset Full Table .....                                    | 2         |
| Table OA2. Regression Results using Augmented 2016 Dataset Full Table.....                           | 3         |
| Table OA3. Regression Results using 2020 Chicago MSA Dataset.....                                    | 4         |
| <b>II. Robustness Checks using Alternative Estimation Methods and Measures for Variables</b> .....   | <b>6</b>  |
| Hubert-White Heteroscedasticity Robust Standard Errors .....                                         | 6         |
| Replacing Missing Neighborhood Average Zestimate Value with City Average .....                       | 7         |
| Alternative Measures for Common and Uncommon Properties .....                                        | 9         |
| <b>III. Robustness Check: Alternative Specification Using Linear Combination of Parameters</b> ..... | <b>11</b> |

# I. Full Regression Results

**Table OA1. Regression Results using 2016 Dataset Full Table  
(Corresponding to the Abridged Table 3 in the main paper)**

|                                       | (3)<br>Common<br>Properties | (4)<br>Uncommon<br>Properties | (5)<br>All<br>Properties   | Wald Test<br>(Total Effect for<br>Uncommon<br>Properties = 0) |
|---------------------------------------|-----------------------------|-------------------------------|----------------------------|---------------------------------------------------------------|
|                                       | <i>log(price)</i>           | <i>log(price)</i>             | <i>log(price)</i>          |                                                               |
| <i>log(description)</i>               | 0.0152<br>(0.0117)          | 0.0390**<br>(0.0131)          | 0.0175<br>(0.0146)         | ***<br>(F stat: 21.43)                                        |
| <i>log(description)×uncommon</i>      |                             |                               | 0.0152<br>(0.0140)         |                                                               |
| <i>#photos</i>                        | -0.0000104<br>(0.000235)    | 0.00124**<br>(0.000424)       | -0.0000853<br>(0.000172)   | ***<br>(F stat: 12.81)                                        |
| <i>#photos×uncommon</i>               |                             |                               | 0.00146**<br>(0.000525)    |                                                               |
| <i>log(facts)</i>                     | 0.0117<br>(0.0151)          | -0.0303<br>(0.0277)           | 0.00536<br>(0.0151)        | (F stat: 0.72)                                                |
| <i>log(facts)×uncommon</i>            |                             |                               | -0.0253<br>(0.0170)        |                                                               |
| <i>uncommon</i>                       |                             |                               | 0.0430<br>(0.124)          |                                                               |
| <i>days on market</i>                 | -0.0000698<br>(0.0000529)   | -0.000342<br>(0.000201)       | -0.000150**<br>(0.0000600) |                                                               |
| <i>save-view-ratio</i>                | 0.0215***<br>(0.00538)      | 0.0644**<br>(0.0245)          | 0.0384**<br>(0.0146)       |                                                               |
| <i>log(Zestimate)</i>                 | 0.971***<br>(0.0112)        | 1.058***<br>(0.0235)          | 1.017***<br>(0.0129)       |                                                               |
| <i>age</i>                            | -0.0000793<br>(0.000128)    | -0.000826<br>(0.000788)       | -0.000394<br>(0.000308)    |                                                               |
| <i>beds</i>                           | -0.0233<br>(0.0154)         | -0.00674<br>(0.0114)          | -0.0116<br>(0.0101)        |                                                               |
| <i>bath</i>                           | 0.00660<br>(0.00506)        | -0.000915<br>(0.0111)         | 0.00554<br>(0.00734)       |                                                               |
| <i>square footage</i>                 | 0.0000201*<br>(0.00000866)  | -0.0000243<br>(0.0000210)     | -0.00000603<br>(0.0000122) |                                                               |
| <i>elementary<br/>school rating</i>   | 0.00330<br>(0.00281)        | 0.00617*<br>(0.00290)         | 0.00317**<br>(0.00128)     |                                                               |
| <i>elementary<br/>school distance</i> | -0.0119<br>(0.00736)        | 0.00425<br>(0.00872)          | 0.000512<br>(0.00972)      |                                                               |
| <i>middle school<br/>rating</i>       | -0.00128<br>(0.000944)      | 0.000922<br>(0.00811)         | 0.0000166<br>(0.00315)     |                                                               |
| <i>middle school<br/>distance</i>     | -0.00362<br>(0.00227)       | -0.0130<br>(0.0119)           | -0.0127*<br>(0.00591)      |                                                               |
| <i>high school<br/>rating</i>         | 0.00239*<br>(0.00117)       | -0.00808<br>(0.0112)          | -0.00256<br>(0.00383)      |                                                               |
| <i>high school<br/>distance</i>       | -0.0109***<br>(0.00262)     | -0.00213<br>(0.00312)         | -0.00158<br>(0.00140)      |                                                               |
| <i>list type fixed effect</i>         | Yes                         | Yes                           | Yes                        |                                                               |

|                             |                  |                     |                     |
|-----------------------------|------------------|---------------------|---------------------|
| <i>monthly fixed effect</i> | Yes              | Yes                 | Yes                 |
| <i>MSA fixed effect</i>     | Yes              | Yes                 | Yes                 |
| <i>constant</i>             | 0.172<br>(0.166) | -0.804**<br>(0.347) | -0.486**<br>(0.157) |
| <i>N</i>                    | 436              | 283                 | 719                 |
| <i>adj. R<sup>2</sup></i>   | 0.970            | 0.958               | 0.962               |

Standard errors in parentheses are robust and clustered at the MSA level.

\*  $p < 0.1$ , \*\*  $p < 0.05$ , \*\*\*  $p < 0.01$ .

**Table OA2. Regression Results using Augmented 2016 Dataset Full Table  
(Corresponding to the abridged Table 4 in the main paper)**

|                                  | (6)<br>Common<br>Properties | (7)<br>Uncommon<br>Properties | (8)<br>All<br>Properties  | Wald Test<br>(Total Effect for<br>Uncommon<br>Properties = 0) |
|----------------------------------|-----------------------------|-------------------------------|---------------------------|---------------------------------------------------------------|
|                                  | <i>log(price)</i>           | <i>log(price)</i>             | <i>log(price)</i>         |                                                               |
| <i>log(description)</i>          | 0.00481<br>(0.00558)        | 0.0269*<br>(0.0129)           | 0.00533<br>(0.00777)      | ***<br>(F stat: 12.65)                                        |
| <i>log(description)×uncommon</i> |                             |                               | 0.0254*<br>(0.0118)       |                                                               |
| <i>#photos</i>                   | 0.000114<br>(0.000267)      | 0.00114**<br>(0.000376)       | -0.0000880<br>(0.0000895) |                                                               |
| <i>#photos×uncommon</i>          |                             |                               | 0.00160***<br>(0.000293)  |                                                               |
| <i>log(facts)</i>                | 0.0100<br>(0.0170)          | -0.0266<br>(0.0279)           | 0.00124<br>(0.0158)       | (F stat: 0.19)                                                |
| <i>log(facts)×uncommon</i>       |                             |                               | -0.0109<br>(0.0217)       |                                                               |
| <i>uncommon</i>                  |                             |                               | -0.132<br>(0.130)         |                                                               |
| <i>seller agent rating</i>       | -0.000403<br>(0.00663)      | 0.124<br>(0.0875)             | 0.0303<br>(0.0629)        |                                                               |
| <i>days on market</i>            | 0.0000192<br>(0.0000550)    | -0.000374<br>(0.000204)       | -0.0000607<br>(0.0000539) |                                                               |
| <i>save-view-ratio</i>           | 0.0263**<br>(0.01000)       | 0.0129<br>(0.0358)            | 0.0298<br>(0.0195)        |                                                               |
| <i>log(Zestimate)</i>            | 0.960***<br>(0.0139)        | 1.063***<br>(0.0424)          | 1.022***<br>(0.0143)      |                                                               |
| <i>age</i>                       | -0.0000304<br>(0.000154)    | -0.00126<br>(0.000829)        | -0.000626**<br>(0.000266) |                                                               |
| <i>beds</i>                      | -0.00133<br>(0.00380)       | 0.00217<br>(0.0173)           | 0.00418<br>(0.00791)      |                                                               |
| <i>bath</i>                      | 0.00289<br>(0.00368)        | -0.00392<br>(0.0170)          | 0.00303<br>(0.0100)       |                                                               |
| <i>square footage</i>            | 0.00000250<br>(0.00000409)  | -0.0000165<br>(0.0000284)     | -0.0000106<br>(0.0000116) |                                                               |
| <i>elementary</i>                | 0.00396***                  | 0.00731                       | 0.00377*                  |                                                               |

|                               |            |           |            |
|-------------------------------|------------|-----------|------------|
| <i>school rating</i>          | (0.000641) | (0.00588) | (0.00191)  |
| <i>elementary</i>             | -0.0182*   | 0.00820   | 0.00451    |
| <i>school distance</i>        | (0.00924)  | (0.00667) | (0.00943)  |
| <i>middle school</i>          | -0.000544  | -0.00130  | 0.000327   |
| <i>rating</i>                 | (0.00110)  | (0.00857) | (0.00344)  |
| <i>middle school</i>          | -0.00168   | 0.00104   | -0.00479   |
| <i>distance</i>               | (0.00238)  | (0.00627) | (0.00448)  |
| <i>high school</i>            | -0.00125   | -0.0155*  | -0.00924** |
| <i>rating</i>                 | (0.00132)  | (0.00729) | (0.00303)  |
| <i>high school</i>            | -0.00580   | -0.00490  | -0.00152   |
| <i>distance</i>               | (0.00356)  | (0.00366) | (0.00120)  |
| <i>list type fixed effect</i> | Yes        | Yes       | Yes        |
| <i>monthly fixed effect</i>   | Yes        | Yes       | Yes        |
| <i>MSA fixed effect</i>       | Yes        | Yes       | Yes        |
| <i>constant</i>               | 0.414      | -1.547**  | -0.771***  |
|                               | (0.233)    | (0.556)   | (0.225)    |
| <i>N</i>                      | 297        | 200       | 497        |
| <i>adj. R<sup>2</sup></i>     | 0.974      | 0.969     | 0.968      |

Standard errors in parentheses are robust and clustered at the MSA level.

\*  $p < 0.1$ , \*\*  $p < 0.05$ , \*\*\*  $p < 0.01$ .

**Table OA3. Regression Results using 2020 Chicago MSA Dataset  
(Corresponding to the abridged Table 5 in the main paper)**

|                                  | (9)<br>All Properties  |                        | (10)<br>All Properties  | Wald Test<br>(Total Effect for<br>Uncommon<br>Properties = 0) |
|----------------------------------|------------------------|------------------------|-------------------------|---------------------------------------------------------------|
|                                  | <i>log(price)</i>      |                        | <i>log(price)</i>       |                                                               |
| <i>log(description)</i>          | 0.00953<br>(0.00718)   | } **<br>(F stat: 5.67) | 0.00569<br>(0.0128)     | } ***<br>(F stat: 11.27)                                      |
| <i>log(description)×uncommon</i> | 0.0174<br>(0.0128)     |                        | 0.09523***<br>(0.0315)  |                                                               |
| <i>#photos</i>                   | 0.000400<br>(0.000407) | } *<br>(F stat: 3.06)  | 0.00073<br>(0.00077)    | } ***<br>(F stat: 8.00)                                       |
| <i>#photos×uncommon</i>          | 0.000262<br>(0.000537) |                        | 0.00145<br>(0.00107)    |                                                               |
| <i>log(facts)</i>                | 0.00360<br>(0.0553)    | } (F stat: 0.27)       | 0.10156<br>(0.0790)     | } (F stat: 1.46)                                              |
| <i>log(facts)×uncommon</i>       | -0.0281<br>(0.0711)    |                        | 0.03653<br>(0.1384)     |                                                               |
| <i>uncommon</i>                  | 0.0281<br>(0.304)      |                        | -0.68501<br>(0.6189)    |                                                               |
| <i>log(Zestimate)</i>            | 0.801***<br>(0.0278)   |                        |                         |                                                               |
| <i>last residual</i>             |                        |                        | 0.06307***<br>(0.0192)  |                                                               |
| <i>log(assessment)</i>           |                        |                        | 0.18984***<br>(0.04032) |                                                               |
| <i>seller agent rating</i>       | 0.0341***              |                        | 0.10851***              |                                                               |

|                                   |                              |                           |
|-----------------------------------|------------------------------|---------------------------|
|                                   | (0.0110)                     | (0.0314)                  |
| <i>Seller agent sales 12month</i> | -0.0000236<br>(0.0000521)    | -0.0001<br>(0.00012)      |
| <i>dual agent</i>                 | -0.00716<br>(0.0109)         | -0.0011<br>(0.0210)       |
| <i>days on market</i>             | -0.000715***<br>(0.000123)   | -0.000305***<br>(0.00009) |
| <i>age</i>                        | -0.000180*<br>(0.000100)     | -0.00036*<br>(0.00022)    |
| <i>bedrooms</i>                   | 0.00451<br>(0.00430)         | 0.01355<br>(0.00912)      |
| <i>bathrooms</i>                  | 0.0214***<br>(0.00607)       | 0.11708***<br>(0.0121)    |
| <i>square footage</i>             | 0.0000233***<br>(0.00000458) | 0.00007***<br>(0.00001)   |
| <i>elementary school rating</i>   | 0.00485*<br>(0.00253)        | 0.0182***<br>(0.0049)     |
| <i>high school rating</i>         | 0.00251<br>(0.00492)         | -0.00232<br>(0.0283)      |
| <i>walk score</i>                 | 0.000808*<br>(0.000447)      | 0.00146<br>(0.0009)       |
| <i>transit score</i>              | 0.000158<br>(0.000837)       | 0.0011<br>(0.0019)        |
| <i>lot size in sqft</i>           | 0.00000**<br>(0.00000)       | 0.00000<br>(0.0000)       |
| <i>monthly fixed effect</i>       | Yes                          | Yes                       |
| <i>neighborhood fixed effect</i>  | Yes                          | Yes                       |
| <i>constant</i>                   | 3.028***<br>(0.429)          | 9.940***<br>(0.668)       |
| <i>N</i>                          | 3054                         | 1615                      |
| <i>adj. R<sup>2</sup></i>         | 0.965                        | 0.913                     |

Standard errors in parentheses. Robust standard errors in Model 1, and two-stage bootstrap standard errors in Model 2 to correct for the generated regressor problem.

\*  $p < 0.1$ , \*\*  $p < 0.05$ , \*\*\*  $p < 0.01$ .

## II. Robustness Checks using Alternative Estimation Methods and Measures for Variables

We conduct a few checks to evaluate the robustness of the main findings with respect to alternative estimation methods of stand errors, alternative treatments of missing neighborhood average Zestimate values, and alternative measures for common and uncommon properties. The details are provided below.

### Hubert-White Heteroscedasticity Robust Standard Errors

In the main analyses, we have used the cluster-robust method to estimate standard errors. There is a discussion regarding whether such a complex estimate is necessary when a simple method might also work (Wooldridge 2003, Imbens and Wooldridge 2007). We replicate the analysis shown in Table 4 using the simpler Hubert-White heteroscedasticity standard error estimator instead of the cluster-robust estimator. This estimator remains robust to heteroscedasticity, but relaxes the assumption of within-group correlation of errors. The results are summarized in Table OA4. There are some minor differences between the results in Table OA4 and Table 4. Notably, under Hubert-White robust standard errors, the coefficient for  $\log(\text{description})$  is significant at the 10% level for uncommon properties. However, given that the coefficient for uncommon properties is around 250% for common properties, the general observation that online property information has a much bigger impact on uncommon properties than on common properties remains valid.

**Table OA4. Results based on Hubert-White Heteroscedasticity Standard Error Estimator**

|                         | Common Property<br><i>log(price)</i> | Uncommon Property<br><i>log(price)</i> |
|-------------------------|--------------------------------------|----------------------------------------|
| <i>log(description)</i> | 0.0152*<br>(0.00914)                 | 0.0390*<br>(0.0201)                    |
| <i>#photos</i>          | -0.0000104<br>(0.000372)             | 0.00124**<br>(0.000595)                |
| <i>log(facts)</i>       | 0.0117<br>(0.00978)                  | -0.0303<br>(0.0222)                    |
| <i>save-view-ratio</i>  | 0.0215<br>(0.0155)                   | 0.0644**<br>(0.0316)                   |
| <i>log(Zestimate)</i>   | 0.971***<br>(0.0179)                 | 1.058***<br>(0.0370)                   |
| <i>days on market</i>   | -0.0000698<br>(0.0000671)            | -0.000342*<br>(0.000185)               |
| <i>age</i>              | -0.0000793                           | -0.000826*                             |

|                                       |                             |                            |
|---------------------------------------|-----------------------------|----------------------------|
|                                       | (0.000279)                  | (0.000497)                 |
| <i>beds</i>                           | -0.0233**<br>(0.0103)       | -0.00674<br>(0.0140)       |
| <i>baths</i>                          | 0.00660<br>(0.0108)         | -0.000915<br>(0.0236)      |
| <i>square footage</i>                 | 0.0000201**<br>(0.00000945) | -0.0000243*<br>(0.0000144) |
| <i>elementary<br/>school rating</i>   | 0.00330<br>(0.00405)        | 0.00617<br>(0.00693)       |
| <i>elementary<br/>school distance</i> | -0.0119<br>(0.0124)         | 0.00425<br>(0.00759)       |
| <i>middle school<br/>rating</i>       | -0.00128<br>(0.00385)       | 0.000922<br>(0.0101)       |
| <i>middle school<br/>distance</i>     | -0.00362<br>(0.00565)       | -0.0130<br>(0.00910)       |
| <i>high school<br/>rating</i>         | 0.00239<br>(0.00397)        | -0.00808<br>(0.0119)       |
| <i>high school<br/>distance</i>       | -0.0109**<br>(0.00544)      | -0.00213<br>(0.00321)      |
| <i>list type fixed effect</i>         | Yes                         | Yes                        |
| <i>monthly fixed effect</i>           | Yes                         | Yes                        |
| <i>MSA fixed effect</i>               | Yes                         | Yes                        |
| <i>constant</i>                       | 0.172<br>(0.235)            | -0.804*<br>(0.462)         |
| <i>N</i>                              | 436                         | 283                        |
| <i>adj. R<sup>2</sup></i>             | 0.970                       | 0.958                      |

Huber-White heteroscedasticity robust standard errors in parentheses

\*  $p < 0.1$ , \*\*  $p < 0.05$ , \*\*\*  $p < 0.01$

### Replacing Missing Neighborhood Average Zestimate Value with City Average

The classification of common and uncommon properties is done based on the neighborhood average Zestimate value. Unfortunately, for a neighborhood with limited property information, Zillow may not provide such an average. Thus far, we categorize observations that have missing neighborhood average Zestimate as uncommon properties. An alternative treatment is to compare a property's value with the average property value for a larger area. Fortunately, Zillow provides an average Zestimate for a city, which covers a broader area than a neighborhood and has much fewer missing values. Therefore, as a robustness check, for sold houses without a neighborhood average Zestimate value, we substitute the missing value with the city average Zestimate value when the latter is available. We then rerun our analysis and report the results in Table OA5. We find the findings drawn from Table OA5 and Table 4 are largely consistent.

**Table OA5. Results after Replacing Missing Neighborhood Zestimate with City Zestimate**

|                                   | Common Property          | Uncommon Property         |
|-----------------------------------|--------------------------|---------------------------|
|                                   | <i>log(price)</i>        | <i>log(price)</i>         |
| <i>log(description)</i>           | 0.0171<br>(0.0156)       | 0.0423***<br>(0.0108)     |
| <i>#photos</i>                    | 0.000119<br>(0.000171)   | 0.00113**<br>(0.000444)   |
| <i>log(facts)</i>                 | 0.00408<br>(0.0164)      | -0.0252<br>(0.0326)       |
| <i>save-view-ratio</i>            | 0.0267*<br>(0.0114)      | 0.0646*<br>(0.0312)       |
| <i>log(Zestimate)</i>             | 0.983***<br>(0.0140)     | 1.062***<br>(0.0307)      |
| <i>days on market</i>             | -0.000117<br>(0.0000687) | -0.000291<br>(0.000169)   |
| <i>age</i>                        | -0.0000418<br>(0.000161) | -0.000794<br>(0.000789)   |
| <i>beds</i>                       | -0.0185<br>(0.0157)      | -0.00441<br>(0.0136)      |
| <i>baths</i>                      | 0.0110<br>(0.0111)       | -0.00519<br>(0.00822)     |
| <i>square footage</i>             | 0.0000183<br>(0.0000106) | -0.0000299<br>(0.0000189) |
| <i>elementary school rating</i>   | 0.00148<br>(0.000805)    | 0.00630<br>(0.00436)      |
| <i>elementary school distance</i> | -0.0136*<br>(0.00628)    | 0.00357<br>(0.00835)      |
| <i>middle school rating</i>       | 0.00107<br>(0.00300)     | -0.00145<br>(0.00880)     |
| <i>middle school distance</i>     | -0.00786<br>(0.00460)    | -0.0150<br>(0.0131)       |
| <i>high school rating</i>         | 0.00249<br>(0.00166)     | -0.00899<br>(0.0129)      |
| <i>high school distance</i>       | 0.000327<br>(0.00235)    | -0.00123<br>(0.0104)      |
| <i>list type fixed effect</i>     | Yes                      | Yes                       |
| <i>monthly fixed effect</i>       | Yes                      | Yes                       |
| <i>MSA fixed effect</i>           | Yes                      | Yes                       |
| <i>constant</i>                   | 0.0273<br>(0.153)        | -0.928*<br>(0.487)        |
| <i>N</i>                          | 467                      | 252                       |
| <i>adj. R<sup>2</sup></i>         | 0.965                    | 0.959                     |

Standard errors in parentheses are robust and clustered at the MSA level.

\*  $p < 0.1$ , \*\*  $p < 0.05$ , \*\*\*  $p < 0.01$

This consistency further corroborates our information-based explanation. After all, a property being uncommon and its neighborhood information being limited have a similar impact on buyers and sellers —

both imply that less offline information is available about comparable properties, hence driving them to seek information online.

### Alternative Measures for Common and Uncommon Properties

So far, we have classified a property as uncommon if either its Zestimate is outside the 70% to 130% range of the reported neighborhood average Zestimate, or the neighborhood average Zestimate is missing. To make sure our findings are not driven by these particular cutoff points, we adopt other cutoff ratios and report the results in Table OA6. We consider three alternative cutoff ratios in the additional analysis, i.e., 65%–135% (Columns (1) and (2)), 75%–125% (Columns (3) and (4)), and 80%–120% (Columns (5) and (6)). Qualitatively, there is little difference between what we observe from Table OA6 and our findings from Table 4. The impact of online property information on offline transaction price for common properties remains in sharp contrast with that for uncommon properties across all three alternative cutoff ratios.

**Table OA6. Results with Alternative Measures of Common and Uncommon Properties**

|                         | (1)                         | (2)                      | (3)                       | (4)                     | (5)                       | (6)                      |
|-------------------------|-----------------------------|--------------------------|---------------------------|-------------------------|---------------------------|--------------------------|
|                         | Common<br>Property          | Uncommon<br>Property     | Common<br>Property        | Uncommon<br>Property    | Common<br>Property        | Uncommon<br>Property     |
|                         | <i>log(price)</i>           | <i>log(price)</i>        | <i>log(price)</i>         | <i>log(price)</i>       | <i>log(price)</i>         | <i>log(price)</i>        |
| <i>log(description)</i> | 0.0137<br>(0.0121)          | 0.0446**<br>(0.0183)     | 0.0119<br>(0.00971)       | 0.0353**<br>(0.0152)    | 0.0129<br>(0.00884)       | 0.0234<br>(0.0157)       |
| <i>#photos</i>          | 0.0000443<br>(0.000136)     | 0.00114***<br>(0.000334) | 0.0000596<br>(0.000157)   | 0.00105**<br>(0.000331) | 0.000279*<br>(0.000125)   | 0.000910**<br>(0.000308) |
| <i>log(facts)</i>       | 0.00777<br>(0.0154)         | -0.0293<br>(0.0293)      | 0.0101<br>(0.0157)        | -0.0199<br>(0.0257)     | 0.0142<br>(0.0184)        | -0.0208<br>(0.0223)      |
| <i>save-view-ratio</i>  | 0.0210***<br>(0.00530)      | 0.0737**<br>(0.0287)     | 0.0218*<br>(0.0101)       | 0.0615***<br>(0.0120)   | 0.0224*<br>(0.0110)       | 0.0563***<br>(0.0150)    |
| <i>log(Zestimate)</i>   | 0.985***<br>(0.0120)        | 1.061***<br>(0.0230)     | 0.976***<br>(0.00317)     | 1.043***<br>(0.0271)    | 0.965***<br>(0.00613)     | 1.047***<br>(0.0236)     |
| <i>days on market</i>   | -0.0000649<br>(0.0000563)   | -0.000380<br>(0.000235)  | -0.0000412<br>(0.0000604) | -0.000260<br>(0.000183) | -0.0000170<br>(0.0000660) | -0.000233<br>(0.000150)  |
| <i>age</i>              | -0.000339***<br>(0.0000880) | -0.000673<br>(0.000851)  | -0.0000311<br>(0.000135)  | -0.000612<br>(0.000664) | 0.0000798<br>(0.000182)   | -0.000515<br>(0.000519)  |
| <i>beds</i>             | -0.0156<br>(0.0112)         | -0.0123<br>(0.0121)      | -0.0159<br>(0.0121)       | -0.0133<br>(0.0108)     | -0.0146<br>(0.0165)       | -0.0149<br>(0.00893)     |
| <i>baths</i>            | 0.00393<br>(0.00463)        | -0.00230<br>(0.0135)     | 0.00189<br>(0.00186)      | 0.00553<br>(0.0138)     | 0.00642<br>(0.00535)      | 0.00601<br>(0.0128)      |

|                                   |                            |                           |                             |                           |                            |                           |
|-----------------------------------|----------------------------|---------------------------|-----------------------------|---------------------------|----------------------------|---------------------------|
| <i>square footage</i>             | 0.00000565<br>(0.00000407) | -0.0000193<br>(0.0000289) | 0.0000202**<br>(0.00000722) | -0.0000218<br>(0.0000172) | 0.0000183*<br>(0.00000781) | -0.0000209<br>(0.0000159) |
| <i>elementary school rating</i>   | 0.00288<br>(0.00289)       | 0.00681<br>(0.00375)      | 0.00395<br>(0.00318)        | 0.00240<br>(0.00395)      | 0.00427<br>(0.00457)       | 0.00289<br>(0.00329)      |
| <i>elementary school distance</i> | -0.00866<br>(0.00832)      | 0.00323<br>(0.00975)      | -0.0130<br>(0.00987)        | 0.00331<br>(0.00866)      | -0.0196<br>(0.0150)        | 0.00386<br>(0.00851)      |
| <i>middle school rating</i>       | -0.0000998<br>(0.000391)   | 0.00108<br>(0.00919)      | -0.00333**<br>(0.00133)     | 0.00415<br>(0.00743)      | -0.00245<br>(0.00207)      | 0.00147<br>(0.00717)      |
| <i>middle school distance</i>     | -0.00271<br>(0.00230)      | -0.0151<br>(0.0129)       | -0.00464<br>(0.00282)       | -0.0114<br>(0.0103)       | -0.0000544<br>(0.00433)    | -0.0112<br>(0.00916)      |
| <i>high school rating</i>         | 0.00101<br>(0.00119)       | -0.00857<br>(0.0121)      | 0.00604**<br>(0.00173)      | -0.0105<br>(0.0110)       | 0.00591**<br>(0.00223)     | -0.00894<br>(0.0106)      |
| <i>high school distance</i>       | -0.0104***<br>(0.00221)    | -0.00168<br>(0.00337)     | -0.00988**<br>(0.00334)     | -0.00248<br>(0.00287)     | -0.00916*<br>(0.00444)     | -0.00235<br>(0.00287)     |
| <i>list type fixed effect</i>     | Yes                        | Yes                       | Yes                         | Yes                       | Yes                        | Yes                       |
| <i>monthly fixed effect</i>       | Yes                        | Yes                       | Yes                         | Yes                       | Yes                        | Yes                       |
| <i>MSA fixed effect</i>           | Yes                        | Yes                       | Yes                         | Yes                       | Yes                        | Yes                       |
| <i>constant</i>                   | 0.0765<br>(0.159)          | -0.896**<br>(0.311)       | 0.130<br>(0.101)            | -0.685*<br>(0.354)        | 0.183<br>(0.160)           | -0.660*<br>(0.293)        |
| <i>N</i>                          | 462                        | 257                       | 394                         | 325                       | 346                        | 373                       |
| <i>adj. R<sup>2</sup></i>         | 0.971                      | 0.954                     | 0.970                       | 0.959                     | 0.967                      | 0.961                     |

Standard errors in parentheses are robust and clustered at the MSA level.

\*  $p < 0.1$ , \*\*  $p < 0.05$ , \*\*\*  $p < 0.01$ .

The results of these robustness checks give us additional confidence that our key findings are robust to alternative methods and explanations.

### III. Robustness Check: Alternative Specification Using Linear Combination of Parameters

To further test the robustness of our findings, we derive an alternative model based on a linear combination of parameters (see Wooldridge 2019, pp. 136-137). The new model does not require a dummy variable and interaction terms, thus allowing us to use the pooled sample and the standard t-tests to test our hypotheses. The linear combination of parameters can be illustrated using number of photos as an example:

Consider the following original model:

$$Y = \alpha + \beta_1 \#photo + \beta_2 \#photo \times uncommon + \varepsilon,$$

Consistent with the main text, the dummy variable *uncommon* indicates whether a property belongs to the uncommon type (equal to 1 for uncommon properties and 0 for common properties). Adding and subtracting the same term  $\beta_1 \#photo \times uncommon$ , we get:

$$Y = \alpha + \beta_1 \#photo - \beta_1 \#photo \times uncommon + \beta_1 \#photo \times uncommon + \beta_2 \#photo \times uncommon + \varepsilon,$$

Rearranging the terms yields:

$$Y = \alpha + \beta_1 \#photo(1 - uncommon) + (\beta_1 + \beta_2) \#photo \times uncommon + \varepsilon,$$

which is equivalent to

$$Y = \alpha + \beta_1 \#photo \times common + (\beta_1 + \beta_2) \#photo \times uncommon + \varepsilon.$$

Here, we introduce a second dummy variable *common* to indicate whether a property belongs to the common type (equal to 1 for common properties and 0 for uncommon properties). In the equation above,  $\beta_1$  represents the effect of *#photo* on common properties, and  $(\beta_1 + \beta_2)$  is the total effect of *#photo* on uncommon properties. By substituting the total impact  $(\beta_1 + \beta_2)$  as  $\tilde{\beta}_2$ , we get:

$$Y = \alpha + \beta_1 \#photo \times common + \tilde{\beta}_2 \#photo \times uncommon + \varepsilon$$

For a given property, only one of the two dummy variables, *common* and *uncommon*, takes the value of 1.

By rearranging the variables, this revised model allows us to run the regressions and test the impact of *#photos* on common properties through t-test on estimated  $\beta_1$ ; and the impact of *#photos* on uncommon properties through t-test on estimated  $\tilde{\beta}_2$ . Similar linear transformations can be done for the other two key variables:  $\log(\text{description})$  and  $\log(\text{facts})$ .

Based on this revised model, we rerun the regressions for the 2016 and 2020 data and summarize the results in Tables OA7 and OA8. Using these two tables, the hypotheses can be tested using t-statistics. We again find that information on experience attributes, represented by the length of property descriptions and the number of photos, has a significant influence on uncommon properties' sale prices, whereas the impact on common properties is found to be insignificant. Information on search attributes, represented by the length of Facts and Features, does not have a significant impact on the sale price of either uncommon properties or common properties. The findings are once again consistent with the main results, thus offering additional evidence for the robustness of our findings.

**Table OA7. Regression Results for 2016 Data After Linear Transformation**

|                                  | (1)<br><i>log(price)</i>   | (2)<br><i>log(price)</i>  |
|----------------------------------|----------------------------|---------------------------|
| <i>log(description)×common</i>   | 0.0175<br>(0.0146)         | 0.00533<br>(0.00777)      |
| <i>log(description)×uncommon</i> | 0.0327***<br>(0.00706)     | 0.0308***<br>(0.00865)    |
| <i>#photos×common</i>            | -0.0000853<br>(0.000172)   | -0.0000880<br>(0.0000895) |
| <i>#photos×uncommon</i>          | 0.00137***<br>(0.000383)   | 0.00151***<br>(0.000269)  |
| <i>log(facts)×common</i>         | 0.00536<br>(0.0151)        | 0.00124<br>(0.0158)       |
| <i>log(facts)×uncommon</i>       | -0.0200<br>(0.0235)        | -0.00961<br>(0.0222)      |
| <i>uncommon</i>                  | 0.0430<br>(0.124)          | -0.132<br>(0.130)         |
| <i>days on market</i>            | -0.000150**<br>(0.0000600) | -0.0000607<br>(0.0000539) |
| <i>save-view-ratio</i>           | 0.0384**<br>(0.0146)       | 0.0298<br>(0.0195)        |
| <i>log(Zestimate)</i>            | 1.017***<br>(0.0129)       | 1.022***<br>(0.0143)      |
| <i>seller agent rating</i>       |                            | 0.0303<br>(0.0629)        |
| <i>age</i>                       | -0.000394<br>(0.000308)    | -0.000626**<br>(0.000266) |

|                                   |                            |                           |
|-----------------------------------|----------------------------|---------------------------|
| <i>beds</i>                       | -0.0116<br>(0.0101)        | 0.00418<br>(0.00791)      |
| <i>baths</i>                      | 0.00554<br>(0.00734)       | 0.00303<br>(0.0100)       |
| <i>square footage</i>             | -0.00000603<br>(0.0000122) | -0.0000106<br>(0.0000116) |
| <i>elementary school rating</i>   | 0.00317**<br>(0.00128)     | 0.00377*<br>(0.00191)     |
| <i>elementary school distance</i> | 0.000512<br>(0.00972)      | 0.00451<br>(0.00943)      |
| <i>middle school rating</i>       | 0.0000166<br>(0.00315)     | 0.000327<br>(0.00344)     |
| <i>middle school distance</i>     | -0.0127*<br>(0.00591)      | -0.00479<br>(0.00448)     |
| <i>high school rating</i>         | -0.00256<br>(0.00383)      | -0.00924**<br>(0.00303)   |
| <i>high school distance</i>       | -0.00158<br>(0.00140)      | -0.00152<br>(0.00120)     |
| <i>Time Fix Effect</i>            | Yes                        | Yes                       |
| <i>Type Fix Effect</i>            | Yes                        | Yes                       |
| <i>MSA Fix Effect</i>             | Yes                        | Yes                       |
| constant                          | -0.486**<br>(0.157)        | -0.771***<br>(0.225)      |
| <i>N</i>                          | 719                        | 497                       |
| <i>adj. R<sup>2</sup></i>         | 0.962                      | 0.968                     |

Standard errors in parentheses  
\*  $p < 0.1$ , \*\*  $p < 0.05$ , \*\*\*  $p < 0.01$

**Table OA8. Regression Results for 2020 Chicago Data After Linear Transformation**

|                                  | (1)                  | (2)                  |
|----------------------------------|----------------------|----------------------|
|                                  | <i>log(price)</i>    | <i>log(price)</i>    |
| <i>log(description)×common</i>   | 0.00953<br>(0.00718) | 0.00577<br>(0.0131)  |
| <i>log(description)×uncommon</i> | 0.0269**<br>(0.0113) | 0.101***<br>(0.0324) |

|                                     |                              |                             |
|-------------------------------------|------------------------------|-----------------------------|
| <i>#photos</i> × <i>common</i>      | 0.000400<br>(0.000407)       | 0.000729<br>(0.000777)      |
| <i>#photos</i> × <i>uncommon</i>    | 0.000662*<br>(0.000378)      | 0.00218**<br>(0.000859)     |
| <i>log(facts)</i> × <i>common</i>   | 0.00360<br>(0.0553)          | 0.101<br>(0.0797)           |
| <i>log(facts)</i> × <i>uncommon</i> | -0.0245<br>(0.0471)          | 0.141<br>(0.122)            |
| <i>uncommon</i>                     | 0.0281<br>(0.304)            | -0.695<br>(0.658)           |
| <i>log(Zestimate)</i>               | 0.801***<br>(0.0278)         |                             |
| <i>last residual</i>                |                              | 0.0605***<br>(0.0184)       |
| <i>log(assess)</i>                  |                              | 0.191***<br>(0.0447)        |
| <i>Seller agent rating</i>          | 0.0341***<br>(0.0110)        | 0.109***<br>(0.0328)        |
| <i>Seller agent sales 12mo</i>      | -0.0000236<br>(0.0000521)    | -0.0000968<br>(0.000121)    |
| <i>Dual agent</i>                   | -0.00716<br>(0.0109)         | -0.00113<br>(0.0223)        |
| <i>days on market</i>               | -0.000715***<br>(0.000123)   | -0.000305***<br>(0.0000908) |
| <i>age</i>                          | -0.000180*<br>(0.000100)     | -0.000357<br>(0.000226)     |
| <i>beds</i>                         | 0.00451<br>(0.00430)         | 0.0134<br>(0.00987)         |
| <i>baths</i>                        | 0.0214***<br>(0.00607)       | 0.117***<br>(0.0109)        |
| <i>square footage</i>               | 0.0000233***<br>(0.00000458) | 0.0000740***<br>(0.0000119) |
| <i>schoolElementary_rating</i>      | 0.00485*<br>(0.00253)        | 0.0182***<br>(0.00532)      |

|                                |                           |                            |
|--------------------------------|---------------------------|----------------------------|
| <i>schoolHigh_rating</i>       | 0.00251<br>(0.00492)      | -0.00230<br>(0.0290)       |
| <i>walk_score</i>              | 0.000808*<br>(0.000447)   | 0.00146<br>(0.000991)      |
| <i>transit_score</i>           | 0.000158<br>(0.000837)    | 0.00109<br>(0.00204)       |
| <i>LotSizeinsqft</i>           | -2.71e-10**<br>(1.32e-10) | -9.50e-10***<br>(2.43e-10) |
| <i>Neighborhood Fix Effect</i> | Yes                       | Yes                        |
| <i>Time Fix Effect</i>         | Yes                       | Yes                        |
| constant                       | 3.028***<br>(0.429)       | 9.940***<br>(0.668)        |
| <i>N</i>                       | 3054                      | 1615                       |
| adj. <i>R</i> <sup>2</sup>     | 0.965                     | 0.913                      |

Standard errors in parentheses

\*  $p < 0.1$ , \*\*  $p < 0.05$ , \*\*\*  $p < 0.01$ .

## References:

Wooldridge, J.M., 2019. *Introductory econometrics: A modern approach. 7<sup>th</sup> edition.* Cengage.
